# Supplementary material
Source: Research Square preprint supplement (doi:10.21203/rs.3.rs-9013656/v1)
Supplement: Supplementary file 1 [file 4c9b04448b9225935114cfa3.xlsx]

## Sheet: Breast-female
Probe	Coefficient	Intercept
cg00152126	0.00354171	0.105453
cg00212520	0.0100307
cg00547021	0.0156769
cg00613691	0.00572975
cg01592081	0.0100771
cg02156776	0.00224109
cg03415804	0.00187183
cg03825810	0.00958744
cg04331199	0.0176104
cg05256765	0.0156766
cg06006266	0.000541618
cg06481660	0.0380071
cg06921345	0.00066045
cg06936402	0.00228223
cg07454595	0.00170063
cg07643404	0.00542193
cg07687739	0.00401074
cg07815672	0.0140035
cg07935562	0.00623234
cg08553705	0.0105674
cg08577298	0.020889
cg08655148	0.00804034
cg08989917	0.00801098
cg09085259	0.0348885
cg09318840	0.0106877
cg09949687	0.00842354
cg10395507	0.0108101
cg10473266	0.0083373
cg10476950	0.0344711
cg10647016	0.0173867
cg11024687	0.0029554
cg11294488	0.046967
cg11761242	0.00792707
cg11782380	3.36803e-05
cg11816444	0.000543936
cg12475144	0.0215346
cg12493936	0.00319258
cg13252035	0.00333241
cg13547132	0.0064031
cg13680227	0.000655072
cg13755157	0.00177534
cg14018836	0.00828705
cg14685642	0.00449354
cg15058869	0.00534426
cg16006665	5.89554e-07
cg16305082	0.000313608
cg16526404	0.00422643
cg18900959	5.10303e-05
cg20170989	0.00178443
cg20497304	0.00048852
cg21752624	0.000808538
cg22065513	0.0101889
cg22110103	0.00670099
cg22665804	0.00856509
cg23077822	0.00826176
cg23310345	0.00263867
cg23436081	0.00272782
cg23683497	0.0224645
cg24280255	0.0570172
cg24990379	0.030337
cg25378674	0.00102082
cg25518353	5.14016e-05
cg25672354	0.0152421
cg27082881	0.00970064
cg27621870	0.00176936
cg27626666	0.000375988

## Sheet: Colon
Probe	Coefficient	Intercept
cg00037026	0.00741689	0.251225
cg00202150	0.0118995
cg00254793	0.00395126
cg00383611	0.013869
cg00457367	4.27623e-06
cg00547139	0.00163852
cg00779661	0.0017308
cg00795397	0.000342571
cg00871055	8.78065e-05
cg00945089	0.00010526
cg01023355	0.0134273
cg01214384	0.00208289
cg01362696	1.17861e-05
cg01401821	0.00133476
cg01519830	0.0144273
cg01633669	0.00314171
cg01815021	0.00203171
cg01835091	0.000971506
cg01896130	0.00214283
cg01901084	9.74988e-05
cg01928675	0.00170421
cg01939825	0.000881467
cg02094813	0.00498034
cg02181246	0.00196276
cg02269477	0.00177409
cg02313986	0.000265897
cg02345089	0.00454582
cg02432981	0.00126802
cg02433354	0.000297354
cg02561693	0.00162762
cg02620533	0.000854599
cg02653900	0.00392283
cg02815102	0.00638965
cg02887514	0.00186713
cg03009785	0.00307007
cg03051860	0.00462296
cg03078295	0.00078232
cg03096419	0.0030784
cg03109117	1.07661e-05
cg03117444	0.00476012
cg03146143	0.00234645
cg03155138	4.00698e-05
cg03365491	0.000413158
cg03394914	0.0018657
cg03419055	0.00188446
cg03433230	6.52004e-05
cg03624608	0.00324794
cg03642749	0.00333967
cg03827471	1.8198e-05
cg03935060	0.00152939
cg03939424	1.20397e-05
cg03966927	0.000547782
cg04071854	0.000995579
cg04119378	0.00545639
cg04119977	0.000219497
cg04157272	0.00160357
cg04242961	0.000261191
cg04274613	0.00552961
cg04416302	0.000198148
cg04424643	0.00420756
cg04505023	0.00102765
cg04540300	6.71973e-05
cg04580960	0.00642767
cg04783185	0.00193579
cg04868325	0.0052768
cg04955876	0.00549079
cg05038287	1.67449e-05
cg05061754	0.000663204
cg05215549	1.09505e-05
cg05221326	0.00568772
cg05261023	0.00223408
cg05321929	4.96088e-06
cg05327577	0.0145819
cg05455971	0.000529727
cg05499882	0.000935594
cg05595424	0.0050889
cg05693257	0.00376508
cg05798859	0.000971617
cg05969258	0.000356898
cg06021126	0.00820519
cg06065346	0.00296932
cg06121412	0.00121379
cg06151579	6.95742e-05
cg06450820	0.00256578
cg06467579	0.00833185
cg06549863	0.00505312
cg06563231	0.0053737
cg06610795	0.00442763
cg06626892	0.00201135
cg06681654	0.00346397
cg06683873	0.00158579
cg06777202	4.79442e-05
cg06785864	0.00309539
cg06975035	2.30345e-05
cg07239744	0.00144882
cg07356803	0.00354782
cg07358145	0.00311532
cg07389125	0.000556208
cg07652246	0.00275878
cg07680566	0.00297849
cg08501497	0.00333675
cg08522276	0.00143899
cg08567760	0.00781197
cg08666080	0.00374777
cg08762819	0.000648136
cg08801953	0.00301818
cg08897266	0.00512287
cg09068633	0.000834162
cg09157127	0.00206072
cg09670051	0.00396573
cg09925887	0.00151158
cg10103000	0.0124723
cg10327932	0.00316296
cg10364641	6.78904e-05
cg10403239	1.00524e-05
cg10685947	0.000856766
cg10796305	0.000105935
cg10912084	0.00474401
cg10981496	0.00209191
cg11010296	0.00391805
cg11073381	0.00809808
cg11228136	0.00511476
cg11368679	0.00412127
cg11421365	0.000624377
cg11425547	5.00391e-05
cg11554489	2.68112e-05
cg11904912	0.000360246
cg11906285	0.00567773
cg12057576	0.000169477
cg12136929	0.00173907
cg12169026	0.000754373
cg12294962	0.000578708
cg12534455	0.00404771
cg12541936	1.8016e-05
cg12839005	0.00010661
cg13057392	0.000554148
cg13155035	0.00134871
cg13256086	0.00164473
cg13280312	0.00184764
cg13320728	0.00176567
cg13396943	0.010978
cg13560924	0.00484418
cg13592285	1.52332e-05
cg13960986	0.000364431
cg14531975	0.00280867
cg14582924	0.00458302
cg14665745	0.00289985
cg14678188	0.00366565
cg14722082	0.00438551
cg14737009	0.00543811
cg14875452	0.00268721
cg14918689	0.00208911
cg15472481	0.00261512
cg15763768	0.00035769
cg15767264	0.000312775
cg16261832	0.00323121
cg16305082	0.00777976
cg16337278	0.00296787
cg16366056	0.00112479
cg16613630	0.00275521
cg16845880	1.82398e-05
cg17049575	0.00130539
cg17182635	2.57533e-05
cg17583136	0.00971242
cg17675840	2.97683e-05
cg17826236	0.00359258
cg17924243	0.000361856
cg17942695	0.000406126
cg17974567	0.00375605
cg18002666	0.00097451
cg18057851	0.000599622
cg18184687	0.00305055
cg18216439	0.00608044
cg18301598	0.00232887
cg18334518	0.00662656
cg18438647	0.000215387
cg18815070	0.0036769
cg18991998	1.06779e-05
cg19357851	0.00165454
cg19404723	0.00502647
cg19407748	0.000796278
cg19441767	0.0011728
cg19589853	0.00703968
cg19621338	0.000433592
cg19712400	0.00115458
cg19716218	0.00041532
cg20120965	0.00301779
cg20307598	0.00187278
cg20382995	0.00257531
cg20551566	0.00424013
cg20588868	0.00256537
cg20627156	0.000383095
cg20689476	0.000134789
cg20830423	0.0103781
cg20972814	9.60208e-05
cg21579782	0.00756971
cg21804467	0.00026337
cg22415472	0.00291685
cg22936822	0.00522197
cg23753006	0.00258555
cg24001678	0.00136381
cg24684798	0.00329515
cg24739798	0.000827198
cg25089771	0.000421949
cg25649765	0.000658774
cg25692449	0.00190438
cg25892606	0.00663195
cg25909121	0.00231697
cg26205385	0.000442675
cg26363309	0.000534591
cg26838150	0.000414638
cg27412897	0.00782222
Sex	0.000452153

## Sheet: Kidney
Probe	Coefficient	Intercept
cg00037317	0.000194484	0.234638
cg00170381	0.00823832
cg00785346	0.0199617
cg01206183	0.00146486
cg01811686	0.00379203
cg02305556	0.00161844
cg02416801	0.00735173
cg02831474	0.000645998
cg03009785	0.0162951
cg03404703	0.011069
cg03447013	3.63732e-07
cg03655527	0.00498672
cg03943115	0.000292291
cg04677882	0.000341062
cg04707338	0.00496544
cg05494579	0.00171594
cg05592086	0.00287298
cg05694245	-0.0238488
cg05707003	0.0149278
cg05944260	0.00432082
cg06043792	0.0370455
cg06260034	0.0015365
cg06497682	0.00349662
cg07184465	0.00069107
cg07311566	0.0111606
cg07642888	0.00363326
cg07695556	0.00907706
cg07769128	0.00328237
cg08037235	0.00721336
cg08199896	0.0373439
cg08222929	0.00630765
cg08293909	0.00041422
cg08352786	0.00477511
cg08605453	0.00146446
cg09299388	0.0199658
cg09573665	0.000231249
cg09674238	0.00809797
cg09944605	0.00180882
cg10060562	0.000572491
cg10618943	0.0169821
cg10634568	0.00411307
cg10849272	0.00882256
cg10875004	1.93627e-05
cg11010296	0.00431354
cg11210670	0.00324657
cg11324379	0.00017318
cg11436271	0.00231168
cg11622428	0.00958948
cg12171195	2.22902e-08
cg12459462	0.00633866
cg12764170	0.00735651
cg13158903	0.000170606
cg13169863	0.000699553
cg13314694	0.00681853
cg13416895	0.00702496
cg13420642	0.0116671
cg13497283	0.00778703
cg13590456	0.0218181
cg13629784	0.00229385
cg13631344	0.00411391
cg13941628	0.0200642
cg14086308	0.0038711
cg14543530	0.00935226
cg14672308	3.20537e-05
cg14869835	0.00144719
cg14957839	0.000133097
cg15069174	0.0381771
cg15362909	6.67286e-05
cg16262257	0.000481536
cg16265399	2.43544e-06
cg16408856	0.000951663
cg16906187	1.08591e-05
cg17222000	0.000570942
cg17569203	0.00363587
cg18222913	0.00639894
cg19619847	0.0058883
cg19634902	8.126e-07
cg20496896	3.40163e-05
cg21291471	0.00456904
cg21362530	0.00547482
cg21929238	0.00706329
cg22138314	8.84609e-06
cg22411670	0.00119131
cg24154699	0.00738058
cg24215459	0.000835019
cg24381465	0.00159248
cg24582743	0.000626529
cg24614974	0.00583002
cg24813193	0.00140439
cg25892606	0.0107393
cg26325951	0.00480147
cg26737357	0.00476904
cg26998456	0.00262415
cg27001079	0.000178657
cg27117476	0.00701481
cg27161779	0.00140367
cg27340584	0.000664078
Sex	0.00400361

## Sheet: Lung
Probe	Coefficient	Intercept
cg00008282	0.000376848	0.364629
cg00293362	0.00430737
cg00296473	0.00288991
cg00327332	0.00321804
cg00353330	0.000725286
cg00365336	0.000438474
cg00454274	0.000733403
cg00512998	0.00178971
cg00690100	0.000303639
cg00743629	0.000755145
cg00776666	0.00306252
cg00876720	8.28314e-05
cg01147025	0.0103105
cg01230224	0.00246493
cg01300957	0.000726112
cg01336845	0.00135103
cg01498249	0.00284107
cg01544454	0.00416133
cg01551540	0.00185353
cg01610676	0.000464821
cg01781897	5.64801e-05
cg01900115	0.000205712
cg02164741	0.000705783
cg02565878	0.000170404
cg02671445	0.00337032
cg02682249	0.000469769
cg02683929	0.000246367
cg02854917	0.00101509
cg02897974	0.000559441
cg03103036	0.00335847
cg03639249	0.000901076
cg03661324	0.00410708
cg03671655	0.00322615
cg03707945	0.000712065
cg03823124	0.00185465
cg03846107	0.00120081
cg04113367	0.000526623
cg04170037	0.000621676
cg04344860	0.000123146
cg04519916	0.00635617
cg04621997	0.000299546
cg04657516	0.00108363
cg04665781	0.0067135
cg04680635	0.00121342
cg04801469	0.000266864
cg04828718	0.000655819
cg04988367	0.00149574
cg05086944	0.000192554
cg05320652	0.00107278
cg05355058	0.00218524
cg05468349	0.00139783
cg05476679	0.000630578
cg05560761	0.00224112
cg05616355	0.00173528
cg05787811	0.000965536
cg05846977	2.66293e-05
cg05949486	0.00130402
cg06174882	2.56036e-05
cg06246668	0.00449455
cg06256007	6.03611e-05
cg06308109	0.000240313
cg06728232	0.0023307
cg06823691	0.00655076
cg07055230	0.00150959
cg07147846	0.000193747
cg07170120	0.00635811
cg07223793	1.77319e-05
cg07260541	0.000244713
cg07266837	3.90354e-05
cg07456815	0.00599307
cg07458366	0.000706339
cg07574468	0.00716392
cg07774193	3.98893e-05
cg07778268	0.00692009
cg07987006	0.00028097
cg08262724	0.00417585
cg08361308	0.000500809
cg08837332	0.0106963
cg08845685	0.00402715
cg08918562	0.00395938
cg09016737	0.00117769
cg09084885	0.0056399
cg09089198	0.00116788
cg09427137	0.00241407
cg09695061	0.00306155
cg09732702	0.00135325
cg09749851	0.00287401
cg09874776	0.000289047
cg10146483	0.000770639
cg10244193	0.00247265
cg10349208	0.00139087
cg10598496	0.00168547
cg10610428	0.00492237
cg10778171	0.00380626
cg10779924	0.000366797
cg10846300	0.000283937
cg11123751	0.00537466
cg11267802	0.00187541
cg11281907	0.00271069
cg11526706	0.00354953
cg11554489	0.00595444
cg11590602	3.83029e-06
cg11590902	0.00362966
cg11659829	0.000436297
cg11832980	2.39497e-06
cg11979414	0.00128509
cg11995374	0.00171627
cg12095505	0.000908462
cg12167090	0.00316059
cg12168186	0.000547219
cg12189084	0.00468783
cg12649828	0.00309831
cg12807368	0.00420907
cg12820291	0.00051878
cg12899588	0.00399815
cg12923574	0.00474611
cg13004961	0.00424752
cg13124798	0.00108343
cg13300024	0.00232091
cg13317875	0.00353137
cg13357998	0.00287359
cg13464738	0.000343489
cg13568858	0.000758989
cg13843366	0.00180147
cg14071548	0.00229669
cg14400169	0.00424404
cg14679628	0.0016201
cg14876535	0.000101638
cg14937293	0.00161938
cg15075221	0.00158357
cg15152331	0.00578313
cg15198331	0.00181291
cg15212935	0.00157241
cg15225594	0.000102765
cg15544146	0.000828999
cg15544562	0.00340629
cg15900609	0.00570305
cg15907819	0.00173478
cg16057587	0.00131332
cg16107470	0.00273231
cg16151261	0.000637694
cg16307474	1.39407e-05
cg16357353	0.000459861
cg16646421	8.83303e-05
cg16712059	7.67865e-05
cg16911214	0.00713521
cg16959054	0.0113049
cg17331706	0.00320009
cg17411055	2.07292e-05
cg17678645	0.00112101
cg17822177	0.00222769
cg17871275	0.00525144
cg17961553	0.000313879
cg18003997	0.000316693
cg18158478	2.10285e-05
cg18183701	5.72366e-06
cg18512262	0.00164824
cg18622715	0.000819847
cg18664461	0.00117544
cg18732047	0.00365892
cg18855174	0.000331862
cg19014749	0.00197968
cg19165278	0.000320274
cg19400001	0.00752973
cg19418958	0.0010266
cg19679543	0.00311721
cg19720260	0.000480345
cg19893587	0.00144926
cg19900254	0.00280693
cg20255713	0.00191101
cg20575856	0.00304998
cg20715648	0.000194248
cg20823049	0.000212508
cg20938617	0.00869682
cg21517830	0.000611589
cg21594685	0.00365725
cg21625740	0.00140323
cg21655246	0.0054398
cg21884589	0.000893892
cg21903321	0.000635916
cg22098540	0.000128278
cg22108980	0.00258225
cg22163030	5.86508e-05
cg22341513	0.0148821
cg22629065	0.00102696
cg22629591	0.000458632
cg22677650	0.00671838
cg22699462	7.20073e-05
cg23350273	0.004133
cg23548886	0.00360588
cg23919611	0.00104037
cg24868768	0.0020603
cg24936204	0.0060657
cg25093471	0.00480744
cg25916172	0.000193652
cg25957194	0.00159586
cg25970726	0.00185459
cg26060835	0.000460201
cg26098312	2.87006e-05
cg26233951	0.00163041
cg26275373	0.00334889
cg26874872	2.29647e-05
cg26916090	0.0023715
cg27036943	0.00229283
cg27310267	0.00156192
cg27431274	0.000309826
cg27438819	0.0112169
cg27475652	0.00258027
cg27663186	0.00216986
Sex	-0.000624826

## Sheet: Ovary
Probe	Coefficient	Intercept
cg00110925	0.00457165	0.385831
cg00618054	3.59283e-05
cg00898927	0.00490533
cg01050214	0.00119165
cg01062024	0.0028545
cg01145688	0.00693009
cg01441386	1.12605e-05
cg01815021	0.00111784
cg01959838	0.00123246
cg02088041	0.000154953
cg02150218	0.000442048
cg02443129	0.000195463
cg02449975	0.00430395
cg02549980	3.60926e-05
cg02611672	0.00566414
cg02788731	0.0012991
cg02896594	0.00649246
cg02914011	0.00118062
cg03076130	0.000695856
cg03095358	1.55331e-05
cg03103331	0.00291427
cg03107144	0.00469672
cg03254596	0.000940885
cg03270639	0.00341556
cg03409534	0.00159299
cg03732759	0.00365662
cg03792060	0.000944206
cg03905236	0.00211891
cg03922363	0.000640946
cg04116507	0.00149842
cg04232823	0.00204011
cg04261529	0.00320222
cg04344860	0.00035327
cg04472227	0.00424616
cg04691233	0.000719059
cg04713531	0.000104245
cg04972599	0.00523414
cg05006639	0.000278183
cg05040398	0.000879728
cg05112903	0.00914867
cg05142057	0.000593128
cg05157791	0.00230448
cg05305046	0.00239452
cg05364273	9.80151e-06
cg05533037	0.000762151
cg05580001	0.0253858
cg05595052	0.00247327
cg05903157	0.000213656
cg06006361	0.00118668
cg06271127	0.00449057
cg06568770	0.00396954
cg06591826	0.000876834
cg06953270	0.0015833
cg07136619	0.000675323
cg07325020	0.000103858
cg07451762	0.000991368
cg07456480	0.00167118
cg07493463	0.00507769
cg07498248	4.40507e-05
cg07697537	0.00460919
cg07721901	0.00014183
cg08001012	0.00431547
cg08164643	0.000118643
cg08261450	0.00187012
cg08505133	0.00173268
cg08641706	0.00320859
cg09105123	0.00237528
cg09210755	0.000635206
cg09240158	0.00717391
cg09779364	0.00706527
cg09809732	0.00162006
cg09821342	0.00316855
cg09925887	0.00164728
cg10004595	5.01436e-05
cg10092198	0.00462484
cg10109486	0.00198666
cg10440524	0.00191937
cg10677886	0.00361429
cg11045928	0.0035601
cg11074968	0.000711267
cg11146039	0.00179473
cg11328909	0.00067874
cg11486141	0.00130995
cg11558867	0.00564056
cg11572844	0.00308506
cg11649195	1.81238e-05
cg11726097	0.000103105
cg11754535	0.00304714
cg11867485	0.00536039
cg12020736	0.000265777
cg12671687	0.00750939
cg12803844	0.00599836
cg12892410	0.000124749
cg13067992	0.00177526
cg13175254	0.00484347
cg13195526	0.0048341
cg13387131	0.00122479
cg14094242	0.00198011
cg14427553	0.000100516
cg14471138	0.00159466
cg14525867	0.00105137
cg14633553	9.70362e-05
cg14982583	0.00237994
cg15328890	0.00494173
cg15413457	0.00191746
cg15912984	0.00146006
cg15985891	0.000269314
cg16042006	0.000911371
cg16075006	0.00664381
cg16081185	0.00158196
cg16555030	0.00109669
cg16760587	0.00238278
cg16919333	0.0016391
cg17006442	0.0105397
cg17460965	7.20207e-06
cg17529058	0.000539914
cg18142906	0.000305562
cg18608761	0.00574054
cg19111544	0.00641557
cg19218187	0.00587628
cg19397294	0.000953835
cg20085217	0.000972083
cg20318330	0.00570352
cg20373335	0.0001614
cg21108929	0.00478782
cg21115977	0.0023035
cg21136445	0.000928451
cg21277447	0.00791451
cg21301148	0.000214742
cg21439129	0.000570616
cg21448513	6.68248e-05
cg22116025	8.04467e-05
cg22235258	0.0059726
cg22816703	0.000838466
cg22867697	0.00759123
cg22916435	0.00567069
cg22977776	0.00307274
cg23165992	0.00140364
cg23239813	0.00021291
cg23542357	0.000184526
cg23617255	7.91654e-05
cg23831458	0.00151467
cg23925173	0.00667395
cg24001678	0.00360144
cg24609100	0.00345042
cg24824128	0.000561141
cg24851880	0.00210652
cg24919210	0.00616695
cg25074078	0.000945948
cg25308562	0.00103657
cg25348251	0.00128184
cg25373325	0.000383494
cg25407540	0.00372419
cg25493335	0.00076652
cg25811526	0.00986781
cg25867632	0.000291445
cg25877377	0.00957918
cg26450574	0.0034613
cg26488200	0.0028134
cg26533236	8.07223e-05
cg26915492	0.00484972
cg27218041	0.000567345

## Sheet: Prostate
Probe	Coefficient	Intercept
cg00124685	8.47443e-05	0.312776
cg00361454	0.000953769
cg00484695	0.00506327
cg00585621	0.000442298
cg01319849	0.000374011
cg01722936	0.00783239
cg02408532	0.00212356
cg02556071	0.00417889
cg02674639	0.00329903
cg02814404	0.0140858
cg03513986	0.00169361
cg03734623	0.000242841
cg04080824	0.000739111
cg04238097	0.00181131
cg04279139	0.00366212
cg04396753	0.0151472
cg04845520	0.000622485
cg04876101	0.00100871
cg05042706	0.000878019
cg05048638	0.000223817
cg05293462	0.00833609
cg05437255	0.00268482
cg05757448	0.00258037
cg06011631	0.0094674
cg06080043	0.00822961
cg06207807	0.00477634
cg06216649	0.00606902
cg06218915	0.011788
cg06225242	0.00514746
cg06316788	0.000672267
cg06555521	9.29609e-06
cg06908211	0.00571975
cg06943309	0.00819245
cg07036991	0.003688
cg07090760	0.0110668
cg07467618	0.00695194
cg07782620	0.00323373
cg07912003	0.00748098
cg07999668	0.00136347
cg08413646	0.00862134
cg08894837	0.00366351
cg09136950	0.000393136
cg09302369	0.000289078
cg10095779	0.0036079
cg10165859	0.00241609
cg10211193	0.000668044
cg10300154	0.00509101
cg10336406	2.74341e-05
cg10536323	0.0067036
cg11191567	0.00340584
cg11479744	0.0162197
cg11601763	0.017413
cg12444077	0.0102651
cg12867822	0.00327576
cg12943885	0.000335399
cg12957455	0.00106728
cg13089671	0.00110726
cg13404309	0.000249244
cg13585586	0.00373321
cg13598834	0.000386237
cg13716414	0.00278114
cg14001281	0.00350893
cg14186349	0.00240962
cg14285032	0.0185241
cg14413700	0.00052101
cg14521562	2.41537e-05
cg15357821	0.00961792
cg15452408	7.12022e-05
cg15471897	0.00668586
cg15848286	0.000411122
cg15930120	0.00414563
cg16175627	0.001312
cg16552769	2.76891e-05
cg16859236	0.000233214
cg16954508	0.00382527
cg17613616	0.00454453
cg17649698	0.001789
cg18087514	0.00181897
cg18122493	0.00118213
cg18180339	0.000362092
cg18593331	0.00361057
cg18677253	0.000405245
cg19249529	0.00807978
cg19363785	0.00533452
cg19367069	0.000119758
cg20120939	0.000990944
cg20126775	0.00900318
cg20260477	0.0111879
cg20399342	0.00318033
cg20682764	0.000198059
cg20972969	0.000897518
cg21206151	0.000707795
cg22053334	0.0550071
cg22091063	0.00161103
cg22137572	0.0013609
cg22152867	4.62993e-06
cg22322245	0.0112354
cg22577252	0.00145825
cg22777028	0.00350829
cg23025725	0.00463664
cg23548616	0.00311112
cg23867673	0.00253439
cg24579534	0.000435766
cg24587727	0.00225245
cg24593279	0.000512947
cg25716102	0.00362675
cg25838533	0.00468624
cg26122963	0.0045937
cg26162435	0.00288033
cg26183409	0.00548788
cg26251585	0.0031197
cg26301424	0.00186972
cg26838150	3.07512e-05
cg26967254	0.00347019
